# Supplementary material for: Artificial intelligence utilising corneal confocal microscopy for the diagnosis of peripheral neuropathy in diabetes mellitus and prediabetes
Source: PubMed Central journal article supplement (PMC8803718; doi:10.1007/s00125-021-05617-x), 2021-11-21
Supplement: 125_2021_5617_MOESM1_ESM.pdf [file 125_2021_5617_MOESM1_ESM.pdf]

**ESM Table 1.** Breakdown of patient groups within the training, validation, and test sets

|                           | <b>Total (n=369)</b>            |                                  |                            |
|---------------------------|---------------------------------|----------------------------------|----------------------------|
|                           | <b>Training set<br/>(n=245)</b> | <b>Validation set<br/>(n=84)</b> | <b>Test set<br/>(n=40)</b> |
| <b>Healthy volunteers</b> | 65                              | 10                               | 15                         |
| <b>Type 1 diabetes</b>    | 63                              | 14                               | 11                         |
| <b>Type 2 diabetes</b>    | 89                              | 42                               | 10                         |
| <b>Prediabetes</b>        | 28                              | 18                               | 4                          |

**ESM Table 2.** Confusion matrix report from MobileNet in HV, PN- and PN+

| True class | Predicted class |     |     |
|------------|-----------------|-----|-----|
|            | HV              | PN- | PN+ |
| HV         | 15              | 0   | 0   |
| PN-        | 5               | 7   | 1   |
| PN+        | 2               | 1   | 9   |

HV, healthy volunteers; PN-, no peripheral neuropathy; PN+, peripheral neuropathy.

**ESM Table 3.** Confusion matrix report from MobileNetV2 in HV, PN- and PN+

| True class | Predicted class |     |     |
|------------|-----------------|-----|-----|
|            | HV              | PN- | PN+ |
| HV         | 13              | 2   | 0   |
| PN-        | 4               | 8   | 1   |
| PN+        | 1               | 2   | 9   |

HV, healthy volunteers; PN-, no peripheral neuropathy; PN+, peripheral neuropathy.

**ESM Table 4.** Classification report from MobileNet in HV, PN- and PN+

| <b>Class</b> | <b>Recall (Sensitivity)</b> | <b>Precision</b>   | <b>F<sub>1</sub>-score</b> |
|--------------|-----------------------------|--------------------|----------------------------|
| HV           | 1.0 (1.0 – 1.0)             | 0.68 (0.50 – 0.87) | 0.81 (0.67 – 0.93)         |
| PN-          | 0.54 (0.25 – 0.82)          | 0.88 (0.57 – 1.0)  | 0.67 (0.36 – 0.87)         |
| PN+          | 0.75 (0.46 – 1.0)           | 0.90 (0.67 – 1.0)  | 0.82 (0.58 – 0.96)         |

Note: 95% CIs are given in brackets. HV, healthy volunteers; PN-, no peripheral neuropathy; PN+, peripheral neuropathy.

**ESM Table 5.** Classification report from MobileNetV2 in HV, PN- and PN+

| <b>Class</b> | <b>Recall (Sensitivity)</b> | <b>Precision</b>   | <b>F<sub>1</sub>-score</b> |
|--------------|-----------------------------|--------------------|----------------------------|
| HV           | 0.87 (0.67 – 1.0)           | 0.72 (0.50 – 0.93) | 0.79 (0.60 – 0.92)         |
| PN-          | 0.62 (0.33 – 0.90)          | 0.67 (0.36 – 0.92) | 0.64 (0.38 – 0.84)         |
| PN+          | 0.75 (0.46 – 1.0)           | 0.90 (0.67 – 1.0)  | 0.82 (0.57 – 0.97)         |

Note: 95% CIs are given in brackets. HV, healthy volunteers; PN-, no peripheral neuropathy; PN+, peripheral neuropathy.

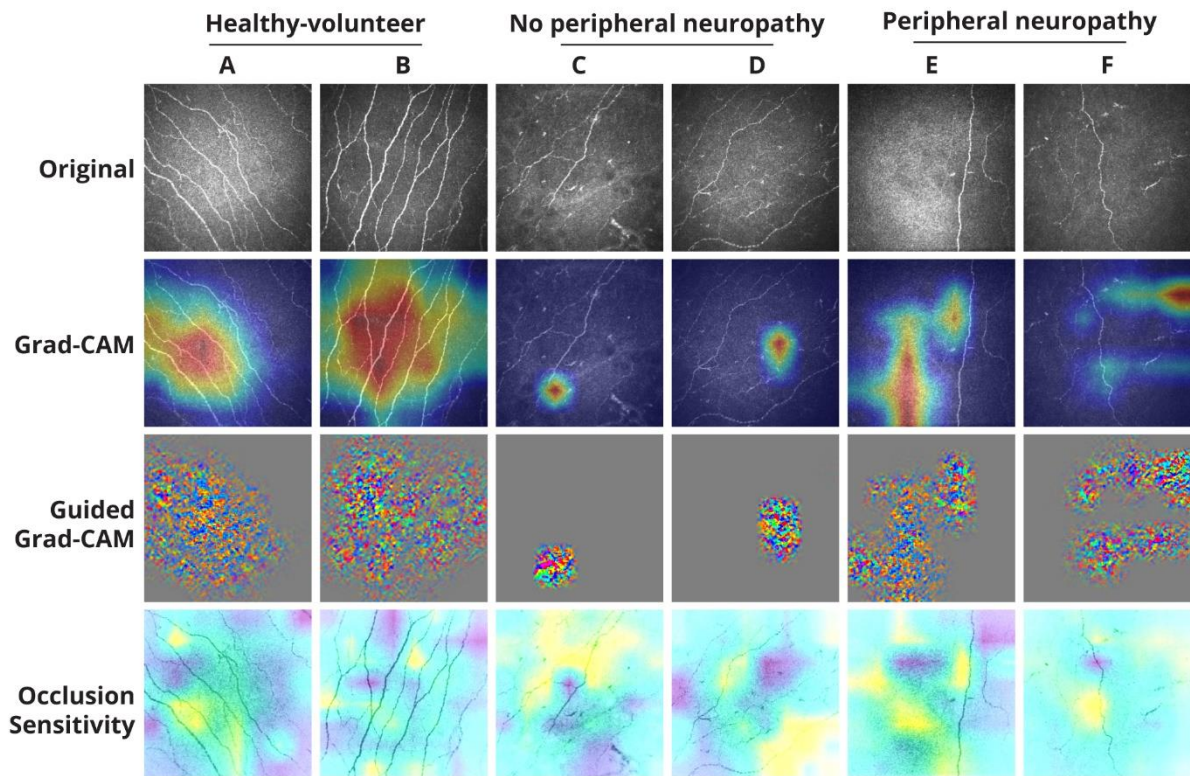

**ESM Fig 1.** Attribution map results from MobileNet. Example images from correctly predicted healthy volunteer (A,B), no peripheral neuropathy (C,D), and peripheral neuropathy (E,F). First row, original images; second row, Grad-CAM (gradient-weighted class activation mapping) images; third row, Guided Grad-CAM images and fourth row, occlusion sensitivity images.

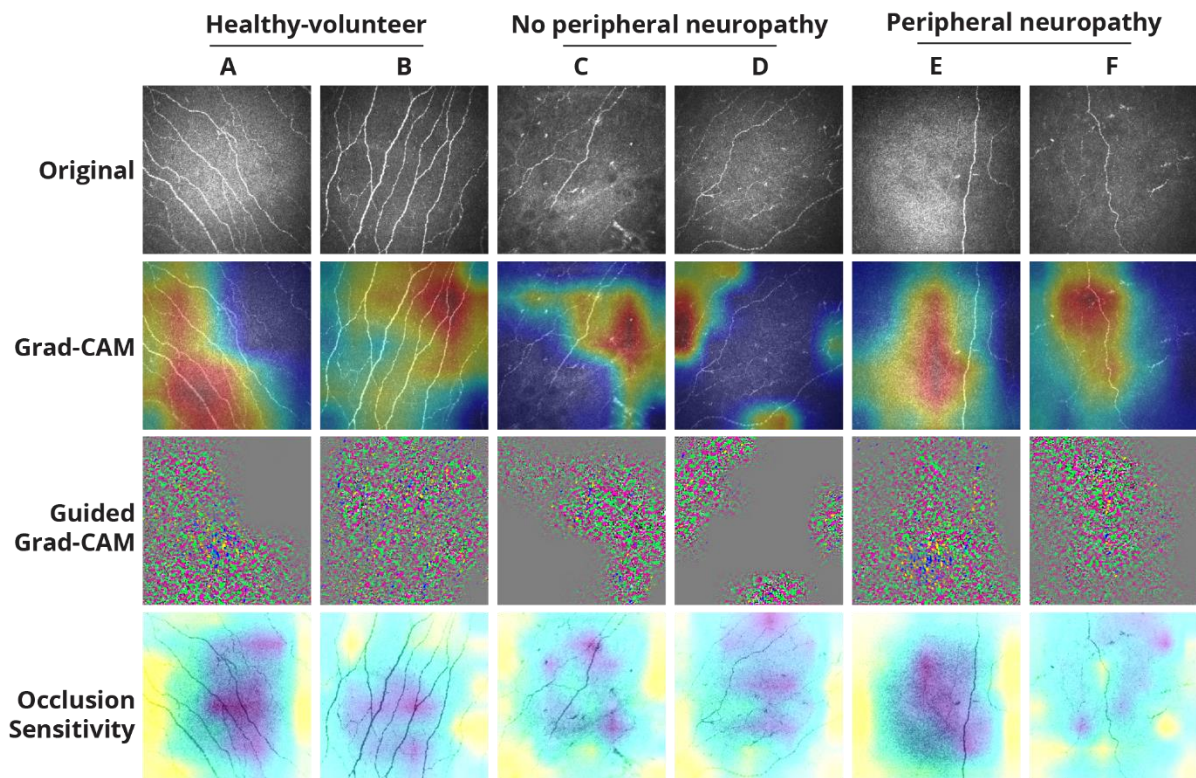

**ESM Fig 2.** Attribution map results from MobileNetV2. Example images from correctly predicted healthy volunteer (A,B), no peripheral neuropathy (C,D), and peripheral neuropathy (E,F). First row, original images; second row, Grad-CAM (gradient-weighted class activation mapping) images; third row, Guided Grad-CAM images and fourth row, occlusion sensitivity images.
